# Supplementary material
Source: Springer Nature journal article supplement (https://www.springermedizin.de/resource/supplementary/12916_2003_16_MOESM9_ESM.pdf/9598988)

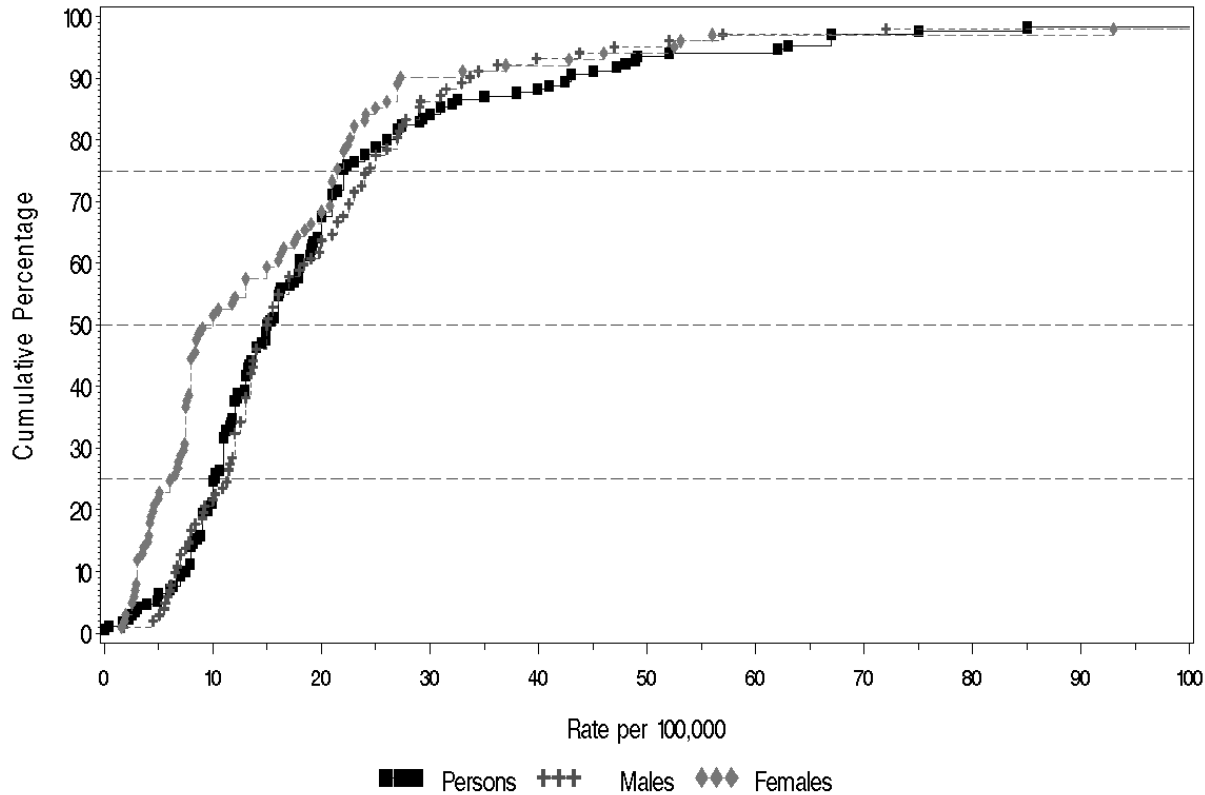

Supplement: MOESM9 [file 9598988]
